# Supplementary material for: A facile fluorine-mediated hydrothermal route to controlled synthesis of rhombus-shaped Co3O4 nanorod arrays and their application in gas sensing
Source: Royal Society of Chemistry journal article supplement (doi:10.1039/c3ta11004d), 2013-01-01
Supplement: c3ta11004d.pdf [file c3ta11004d.pdf]

† Electronic supplementary information

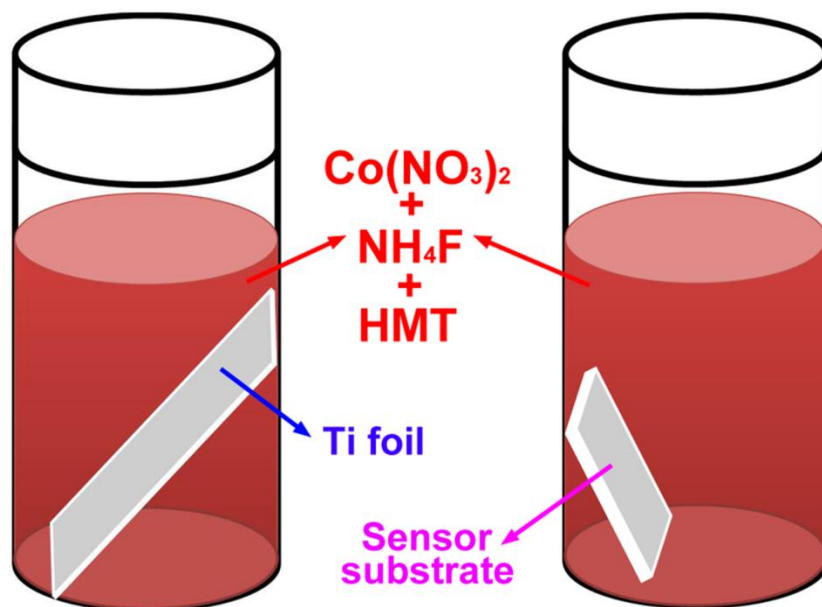

**Fig. S1.** Schematic diagram of the fabricating process.

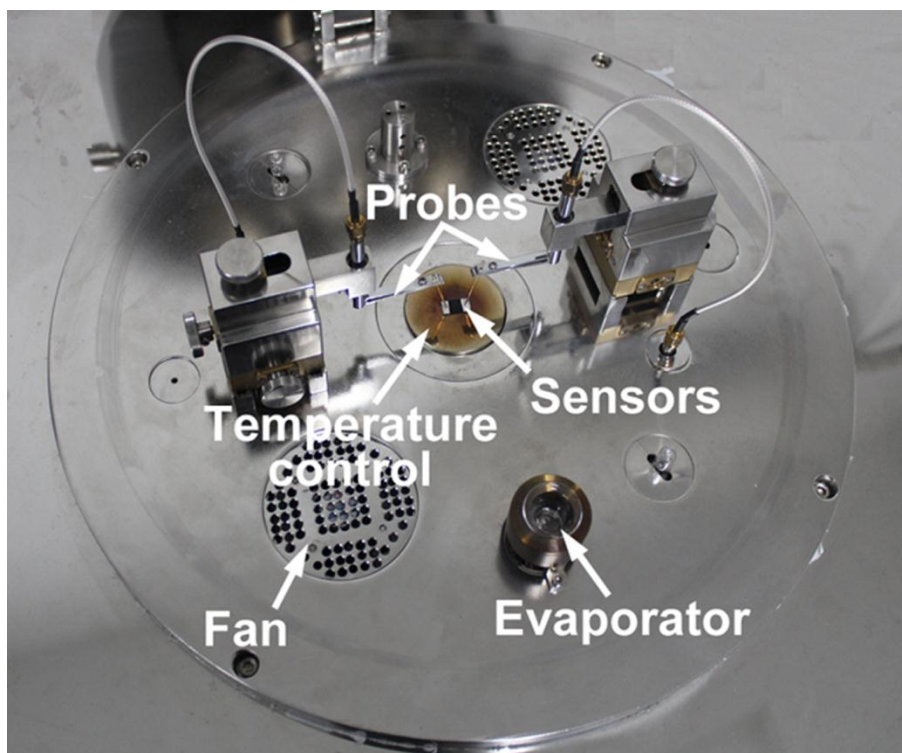

**Fig. S2.** A photograph of the gas sensing analysis system.

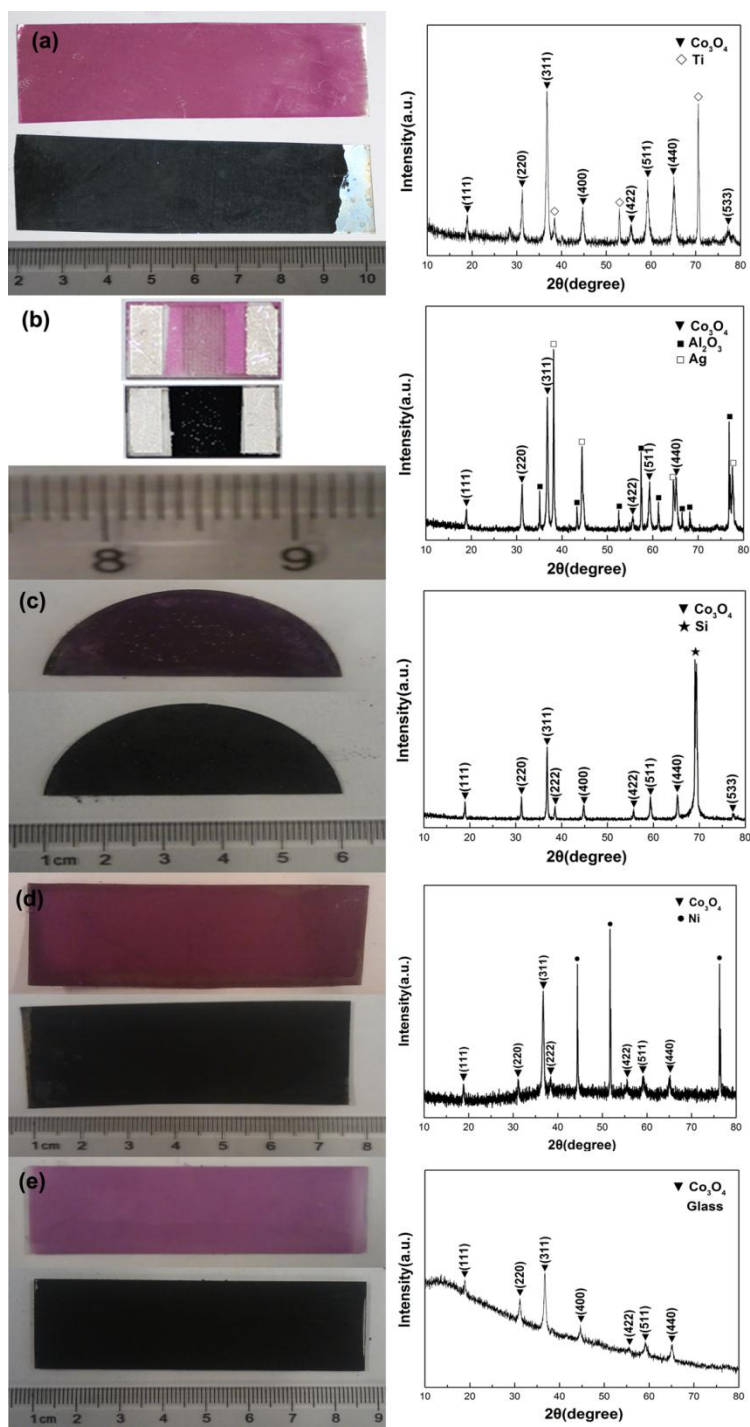

**Fig. S3.** Optical images and XRD patterns of rhombus-shaped  $\text{Co}_3\text{O}_4$  NR array on: (a) Ti foil, (b) polycrystalline alumina plate, (c) Si wafer, (d) Ni foil and (e) glass substrates, respectively.

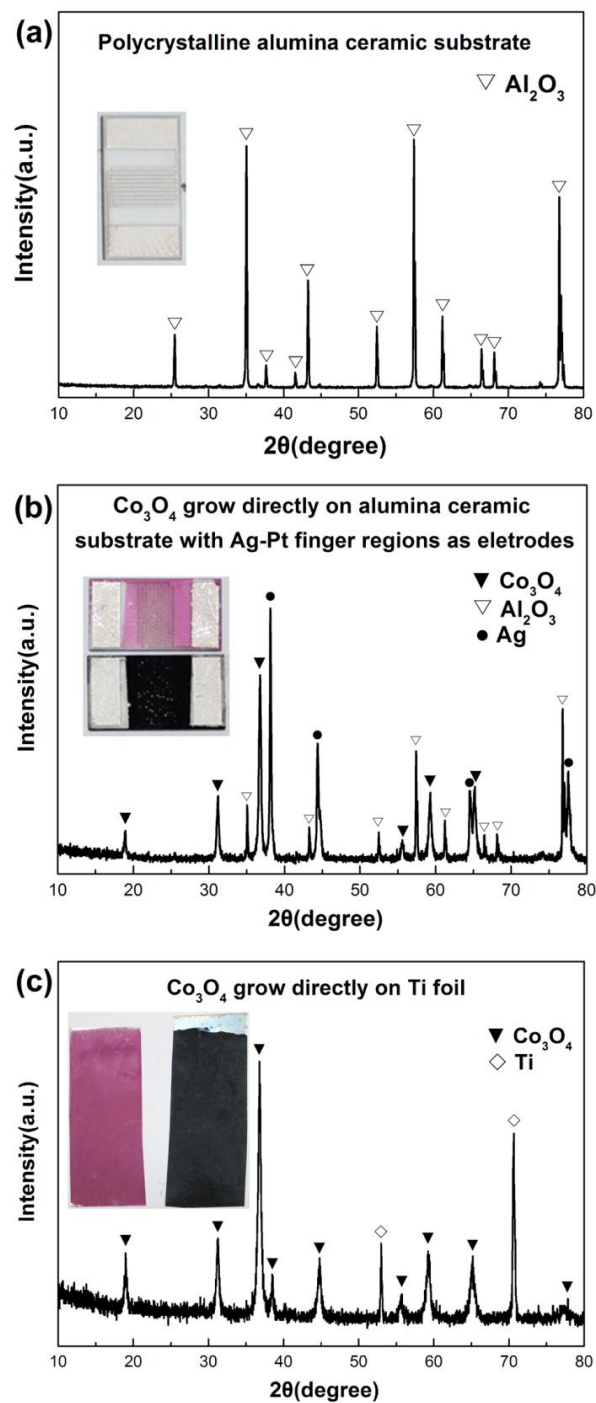

**Fig. S4.** XRD patterns of: (a) polycrystal alumina plate; (b) rhombus-shaped  $\text{Co}_3\text{O}_4$  NRs on polycrystal alumina plate with Ag-Pt electrodes; (c) rhombus-shaped  $\text{Co}_3\text{O}_4$  NRs on Ti foil.

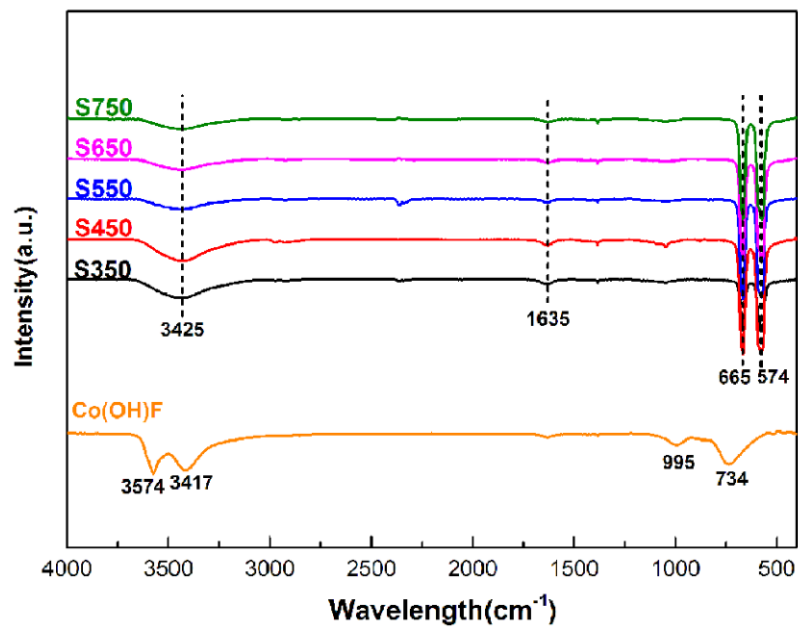

**Fig. S5.** FT-IR spectra of the precursor Co(OH)F and the rhombus-shaped Co<sub>3</sub>O<sub>4</sub> NRs S350-S750, respectively.

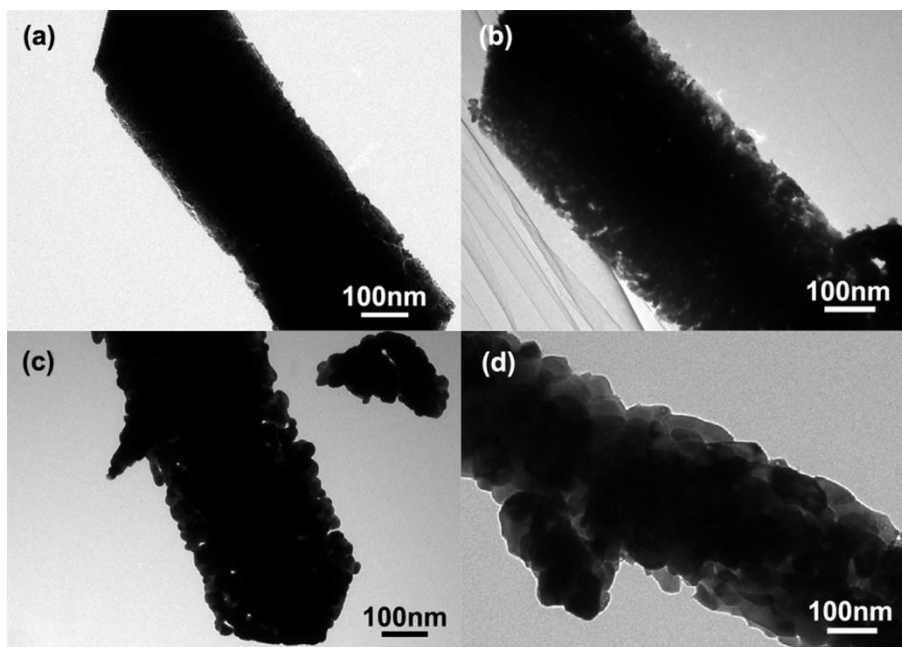

**Fig. S6.** TEM images of a single rhombus-shaped Co<sub>3</sub>O<sub>4</sub> NR annealed at: (a) 350 °C, (b) 550 °C, (c) 650 °C and (d) 750 °C, respectively.
